# Supplementary material for: A label-free electrochemical immunosensor based on decorated cellulose nanofibrous membrane for point-of-care diagnosis of amanitin poisoning via human urine
Source: Royal Society of Chemistry journal article supplement (doi:10.1039/d3lc00508a), 2023-01-01
Supplement: d3lc00508a1.pdf [file d3lc00508a1.pdf]

## Supplementary information

### Label-free Electrochemical Immunosensor based on Decorated Cellulose Nanofibrous Membrane for Point-of-Care Diagnosis of Amanitin Poisoning *via* Human Urine

Ahmed Y. El-Moghazy <sup>1,2\*</sup>, Noha Amaly <sup>1,2</sup>, Nitin Nitin <sup>1,3</sup>, Gang Sun <sup>1</sup>

<sup>1</sup> *Department of Biological and Agricultural Engineering, University of California, Davis, CA 95616, USA.*

<sup>2</sup> *Polymeric Materials Research Department, Advanced Technology and New Materials Research Institute, City of Scientific Research and Technological Applications (SRTA-City), New Borg El-Arab City 21934, Alexandria, Egypt.*

<sup>3</sup> *Food Science and Technology, University of California, Davis, United States.*

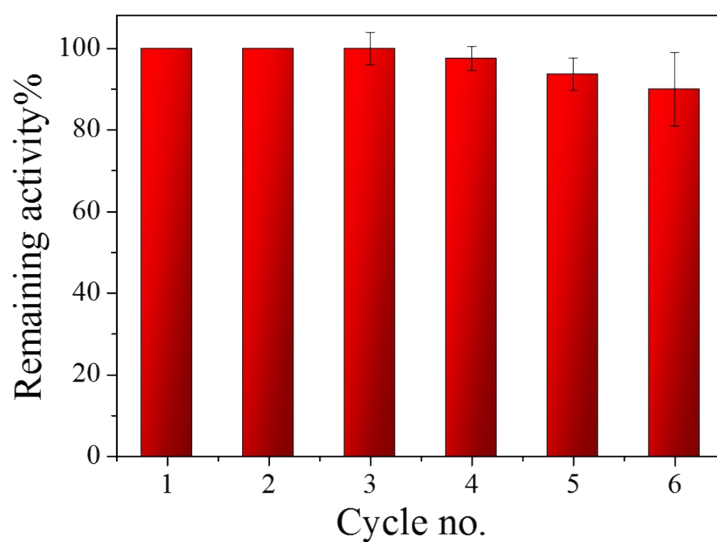

Fig. S1. Reusability of the fabricated immunosensor after the regeneration by dipping the immunosensor into 0.1 M glycine hydrochloric acid buffer (pH 2.8) for 5 min after AMN detection at concentration of 0.1 ng mL<sup>-1</sup>.

**Table S1:** Cross-reactivity of the developed immunosensor for different compounds at 0.1 ng mL<sup>-1</sup>.

| <b>Compound</b>       | <b>C.R%</b> |
|-----------------------|-------------|
| <b>AMN</b>            | <b>100</b>  |
| <b>Psilocybin</b>     | <b>0</b>    |
| <b>Muscimol</b>       | <b>0</b>    |
| <b>Ibotenic</b>       | <b>0</b>    |
| <b>Microcystin-IR</b> | <b>0</b>    |
| <b>Nodularin</b>      | <b>0</b>    |

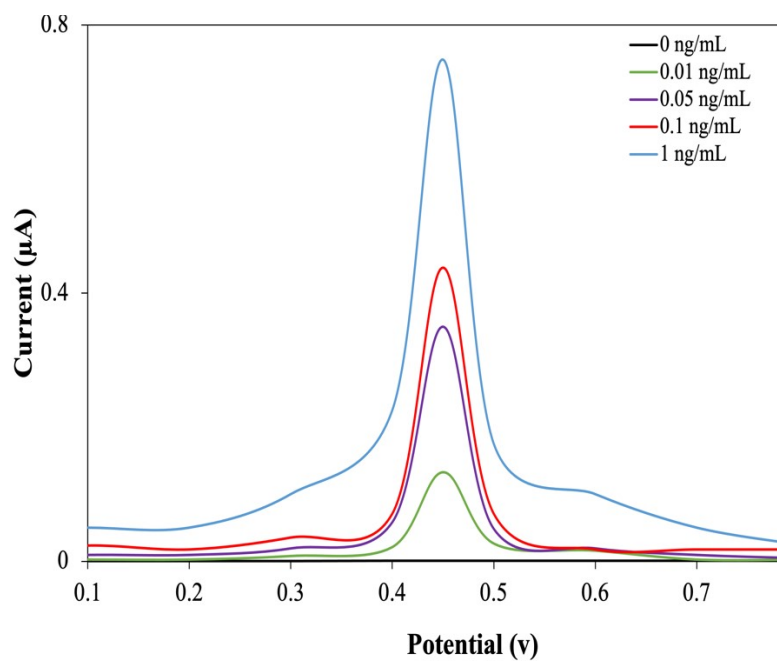

Fig. S2. Electrocatalytic current responses of the fabricated electrochemical immunosensor for the human urine samples spiked with different concentrations of AMN in the range of 0.01 ng mL<sup>-1</sup> to 1 ng mL<sup>-1</sup>
